# Supplementary material
Source: PubMed Central journal article supplement (PMC7864387)

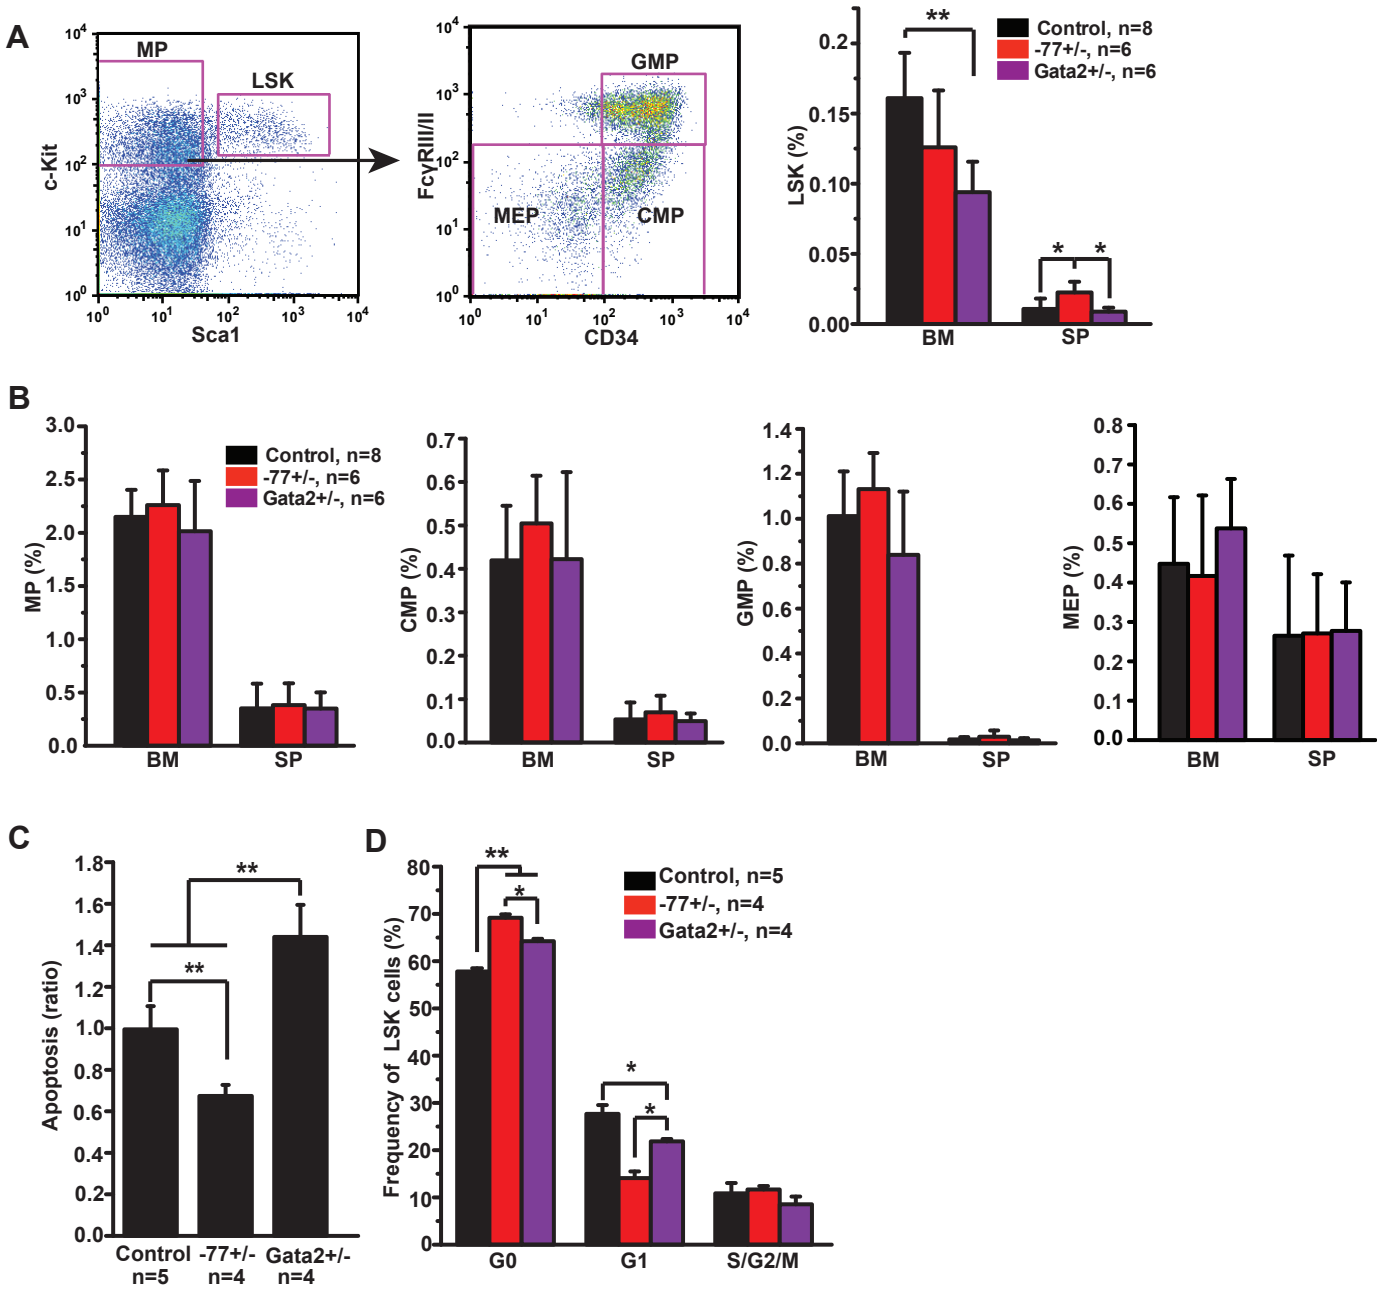

Figure S2-Zhang

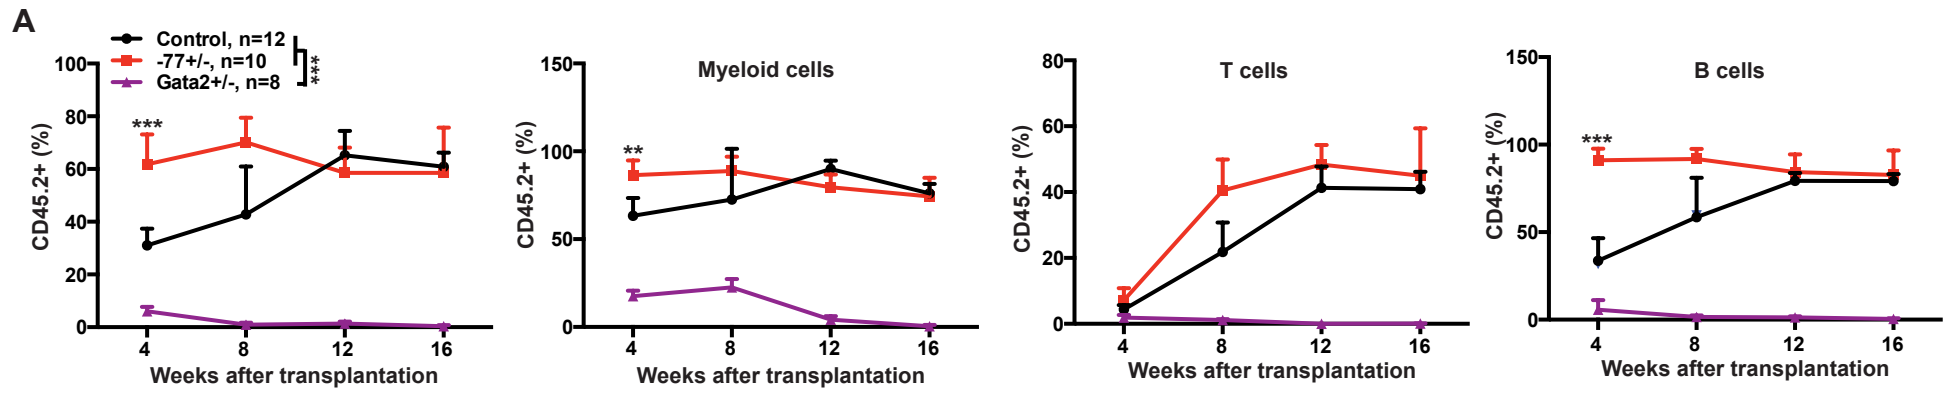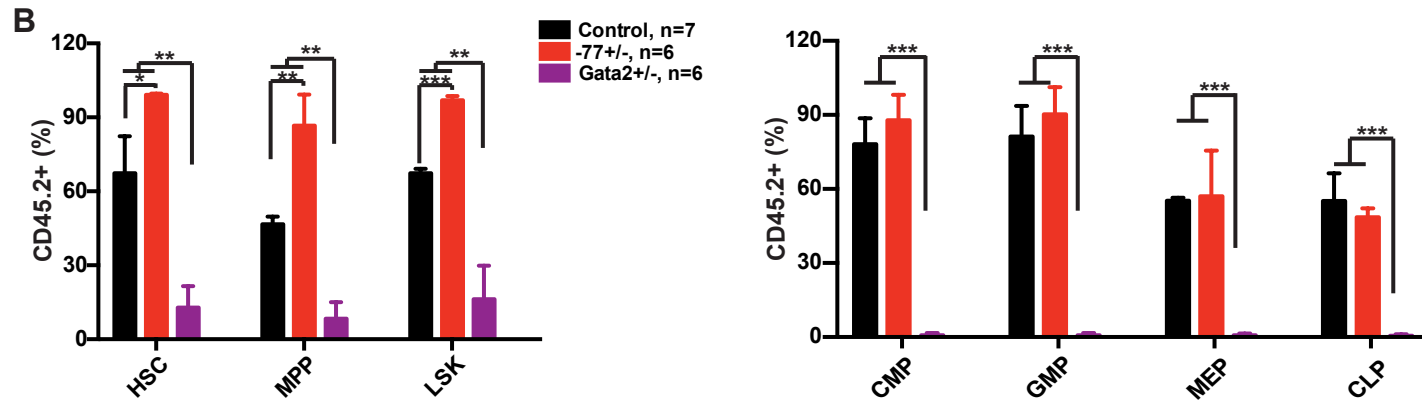

Figure S3-Zhang

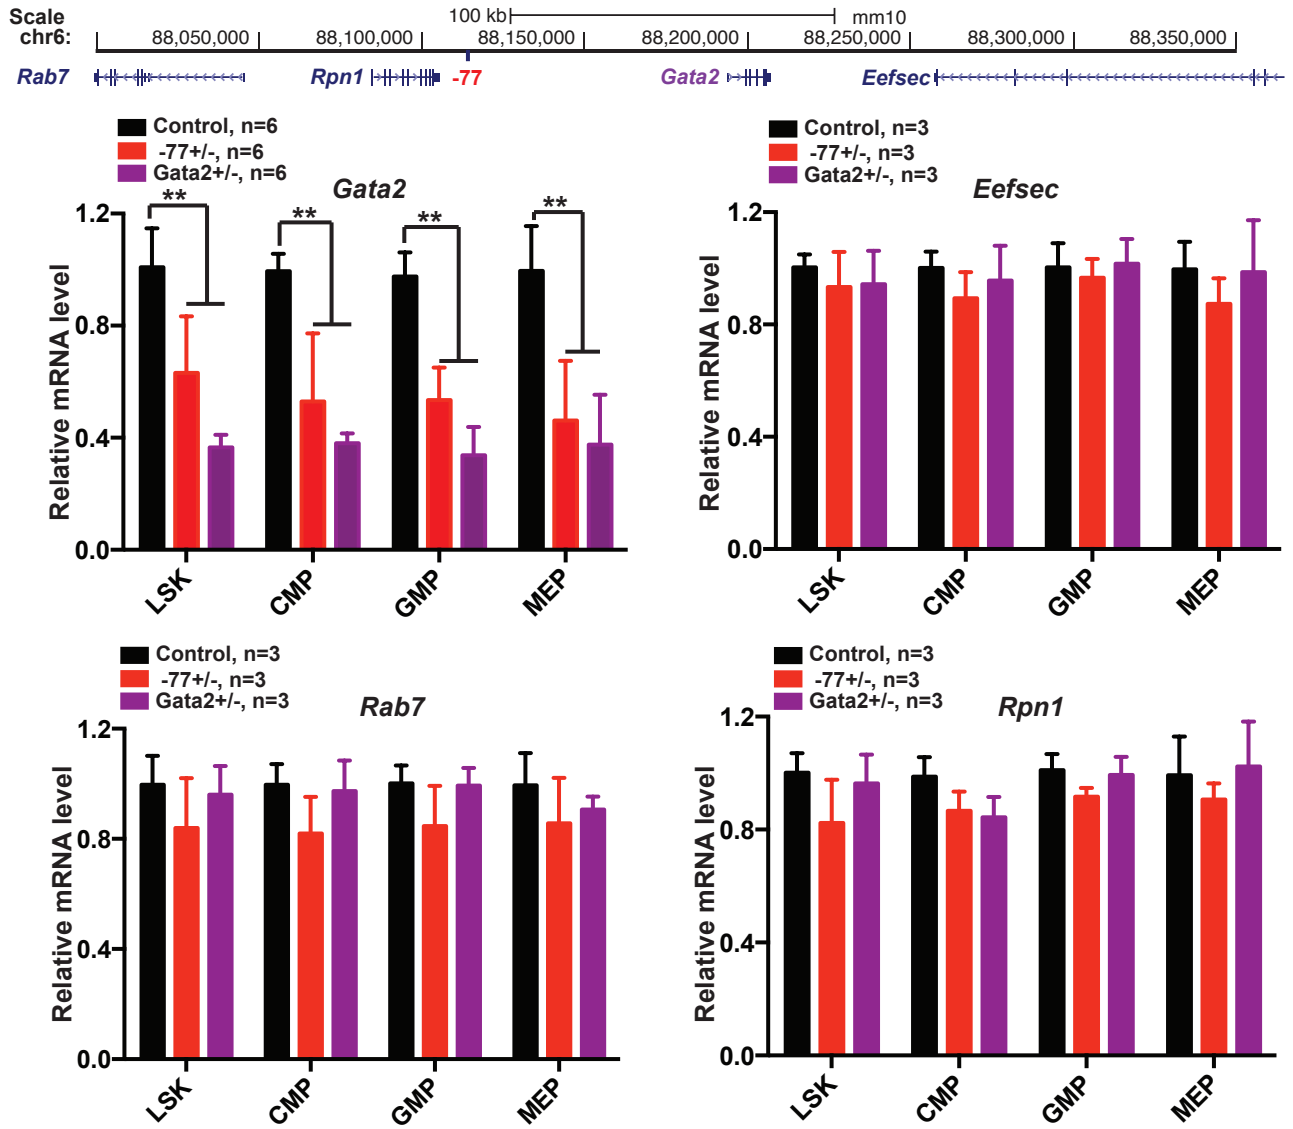

Figure S4-Zhang

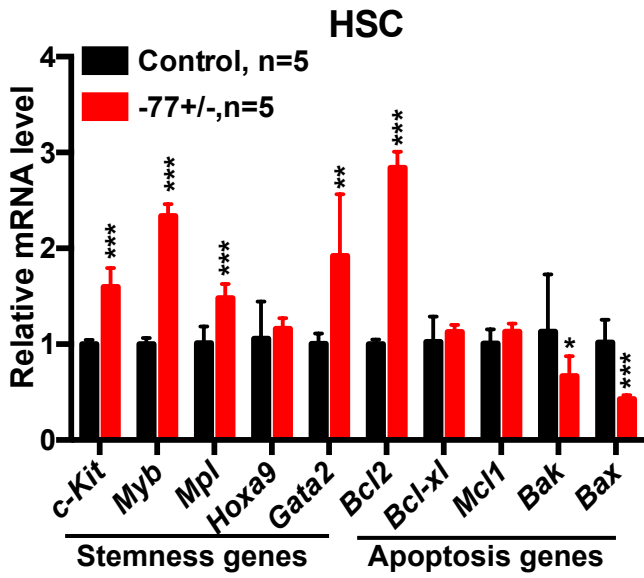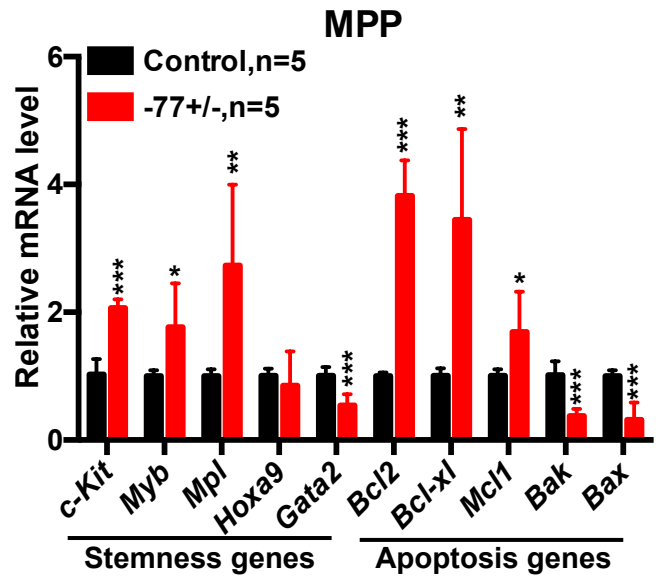

Figure S5

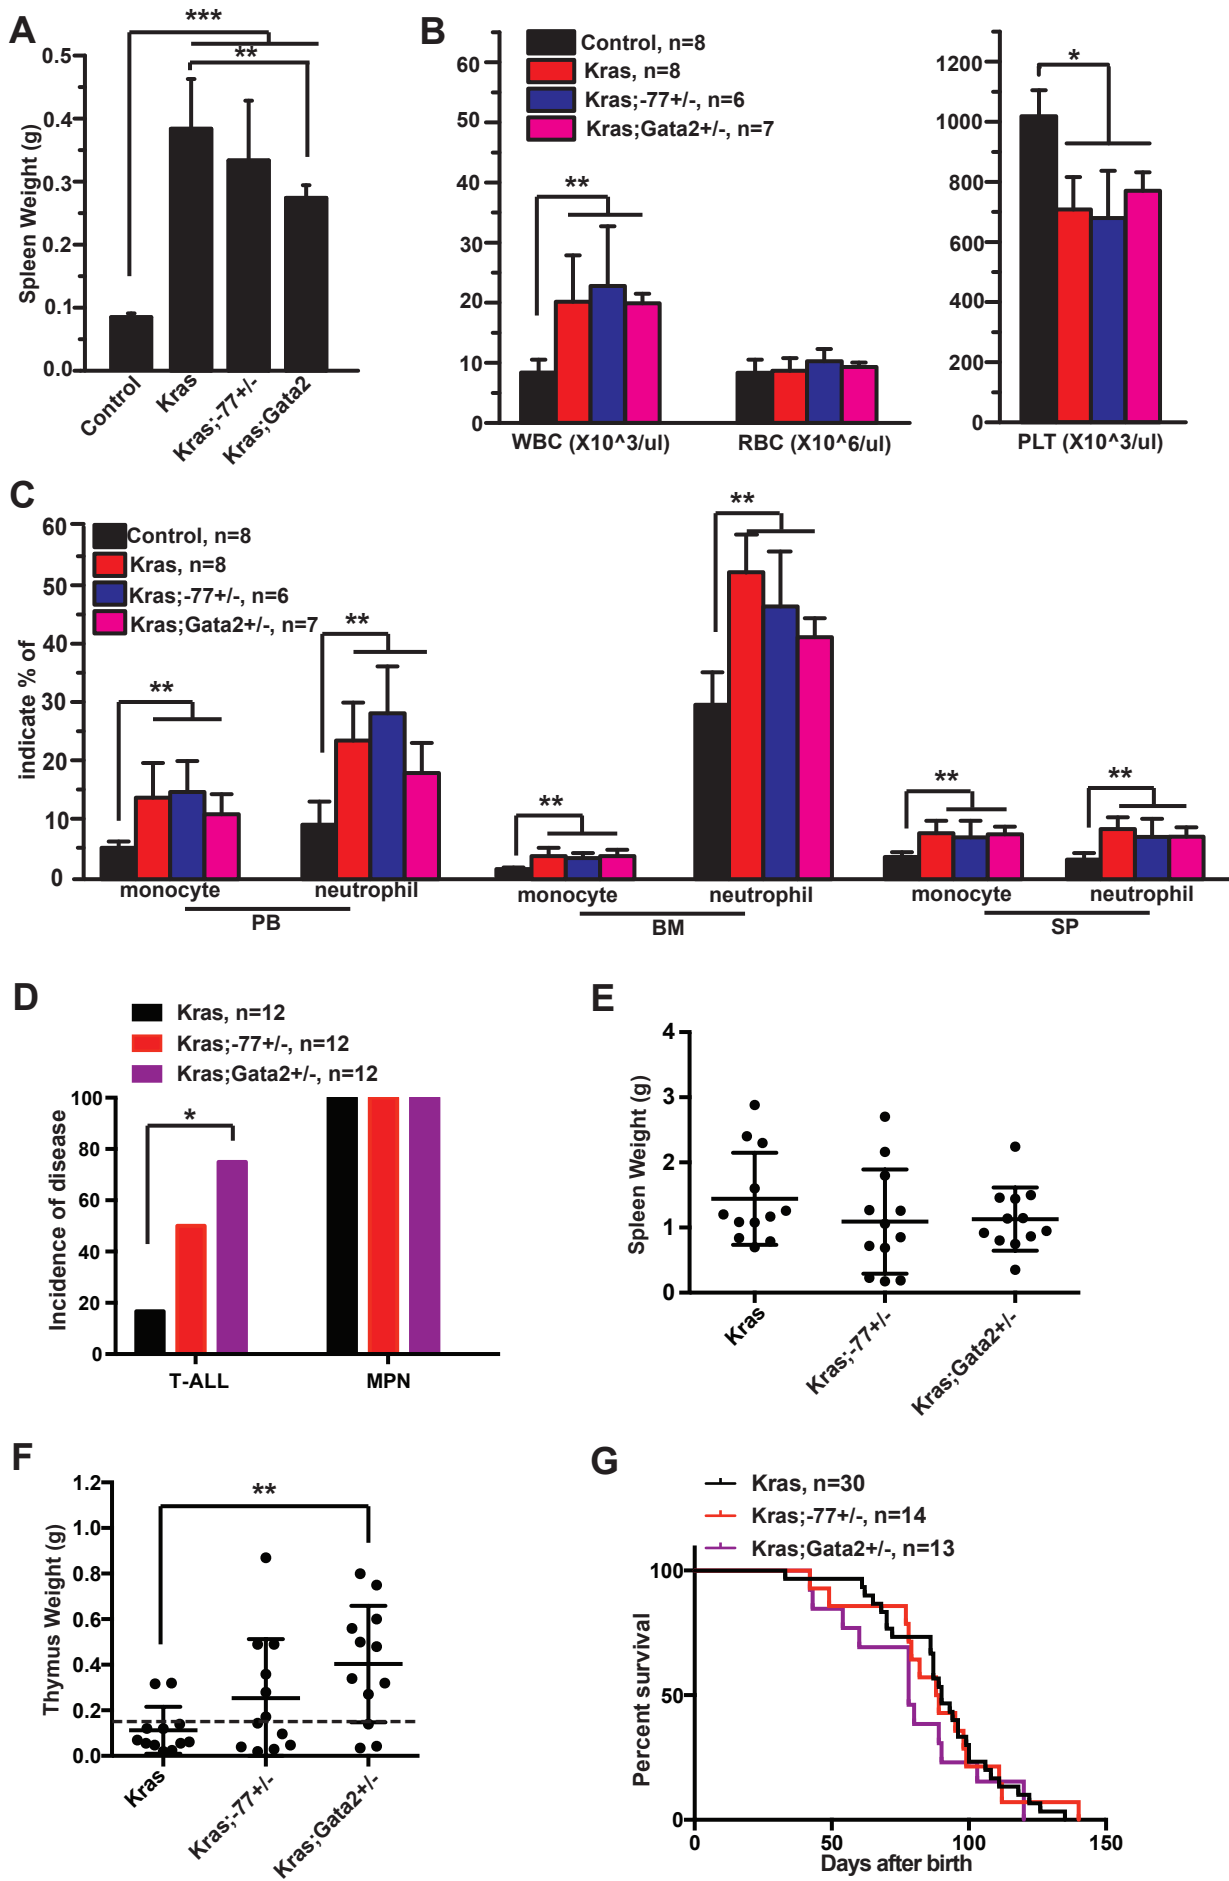

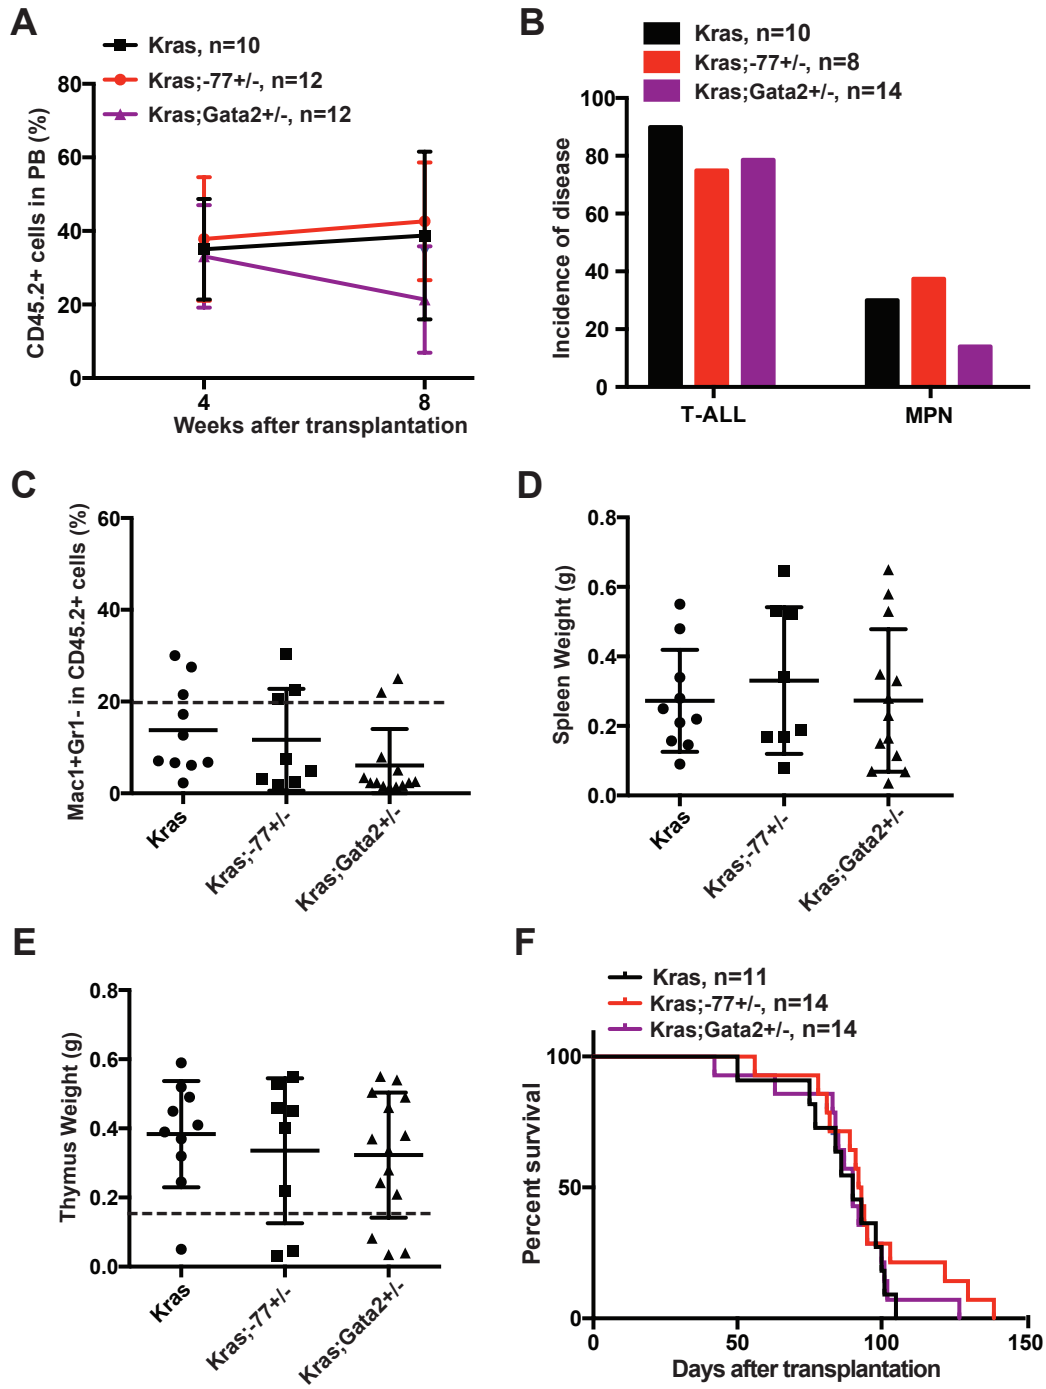

Supplement: NIHMS1662856-supplement-1.pdf [file NIHMS1662856-supplement-1.pdf]
